# Supplementary material for: A multi-institutional analysis of clinical outcomes and patterns of care of 1p/19q codeleted oligodendrogliomas treated with adjuvant or salvage radiation therapy
Source: Springer Nature journal article supplement (doi:10.1007/s11060-019-03344-3), 2019-11-18
Supplement: MOESM1 [file 17401370]

**Supplemental Table S1:** Univariable and multivariable Cox regression analysis for factors associated with worse progression-free survival after the initial diagnosis (PFS1)

|  | **HR (95% CI)** | **P value** | **HR (95% CI)** | **P value** |
| --- | --- | --- | --- | --- |
| Salvage RT (vs adjuvant RT) | 0.49 (0.25-0.93) | 0.03 | 0.89 (0.26-3.09) | 0.86 |
| Older Age | 1.01 (0.99-1.04) | 0.37 |  |  |
| Female sex (vs male) | 1.01 (0.54-1.88) | 0.98 |  |  |
| Non-white race (vs white) | 0.97 (0.38-2.48) | 0.96 |  |  |
| KPS [n=185] | 0.98 (0.96-1.01) | 0.12 |  |  |
| STR/Biopsy (vs GTR) [n=183] | 0.76 (0.40-1.45) | 0.41 |  |  |
| Grade 3 (vs 2) | 2.18 (1.19-3.99) | 0.01 | 1.76 (0.86-3.61) | 0.12 |
| Mixed oligoastrocytoma (vs oligodendroglioma histology) | 0.58 (0.18-1.89) | 0.37 |  |  |
| >1 surgery prior to RT (vs 1 surgery) | 0.48 (0.24-0.96) | 0.04 | 0.70 (0.20-2.46) | 0.57 |
| Chemoradiotherapy Regimen  RT and TMZ  RT and PCV  RT alone | Ref  0.74 (0.26-2.11)  1.20 (0.57-2.50) | --  0.57  0.64 |  |  |
| Proton therapy (vs photon therapy) | 0.64 (0.19-2.10) | 0.46 |  |  |
| High dose (58-63Gy) vs low dose (45-55.8Gy) | 1.10 (0.56-2.16) | 0.77 |  |  |

Abbreviations: as in Tables 1.

**Supplemental Table S2:** Univariable and multivariable Cox regression analysis for factors associated with worse overall survival from the initial diagnosis (OS1) for the subset treated with adjuvant RT (n=124)

|  | **HR (95% CI)** | **P value** | **HR (95% CI)** | **P value** |
| --- | --- | --- | --- | --- |
| Older Age | 1.06 (1.02-1.10) | 0.001 | 1.05 (1.01-1.08) | 0.01 |
| Female sex (vs male) | 1.41 (0.60-3.32) | 0.43 |  |  |
| Non-white race (vs white) | 2.06 (0.69-6.12) | 0.20 |  |  |
| KPS | 0.94 (0.91-0.98) | 0.002 | 0.95 (0.92-0.99) | 0.02 |
| STR/Biopsy (vs GTR) [n=123] | 1.41 (0.56-3.55) | 0.46 |  |  |
| Grade 3 (vs 2) | 0.91 (0.37-2.27) | 0.85 |  |  |
| Mixed oligoastrocytoma (vs oligodendroglioma histology) | 0.48 (0.11-2.07) | 0.32 |  |  |
| Chemoradiotherapy Regimen  RT and TMZ  RT and PCV  RT alone | Ref  1.43 (0.40-5.08)  2.42 (0.91-6.45) | 0.21  --  0.58  0.08 | Ref  1.31 (0.37-4.69)  1.56 (0.56-4.31) | 0.68  --  0.68  0.39 |
| Proton therapy (vs photon therapy) | 0.04 (0.00-269) | 0.48 |  |  |
| High dose (58-63Gy) vs low dose (45-55.8Gy) | 0.80 (0.33-1.93) | 0.61 |  |  |

Abbreviations: as in Tables 1.

**Supplemental Table S3:** Univariable and multivariable Cox regression analysis for factors associated with worse progression-free survival after the initial diagnosis (PFS1) for the subset treated with adjuvant RT (n=124)

|  | **HR (95% CI)** | **P value** |
| --- | --- | --- |
| Older Age | 0.997 (0.97-1.03) | 0.86 |
| Female sex (vs male) | 0.76 (0.34-1.69) | 0.51 |
| Non-white race (vs white) | 0.89 (0.27-2.96) | 0.86 |
| KPS | 0.97 (0.94-1.01) | 0.15 |
| STR/Biopsy (vs GTR) [n=123] | 1.77 (0.80-3.92) | 0.16 |
| Grade 3 (vs 2) | 1.36 (0.60-3.08) | 0.46 |
| Mixed oligoastrocytoma (vs oligodendroglioma histology) | 0.39 (0.09-1.65) | 0.20 |
| Chemoradiotherapy Regimen  RT and TMZ  RT and PCV  RT alone | Ref  0.98 (0.33-2.89)  1.17 (0.45-3.03) | 0.94  --  0.97  0.75 |
| Proton therapy (vs photon therapy) | 0.97 (0.22-4.26) | 0.97 |
| High dose (58-63Gy) vs low (45-55.8Gy) | 1.12 (0.52-2.41) | 0.77 |

Abbreviations: as in Tables 1.
